# Supplementary material for: A Novel Immunomodulatory 27-Gene Signature to Predict Response to Neoadjuvant Immunochemotherapy for Primary Triple-Negative Breast Cancer
Source: MDPI journal article supplement (doi:10.3390/cancers13194839), 2021-09-28
Supplement: s1 [file s1]

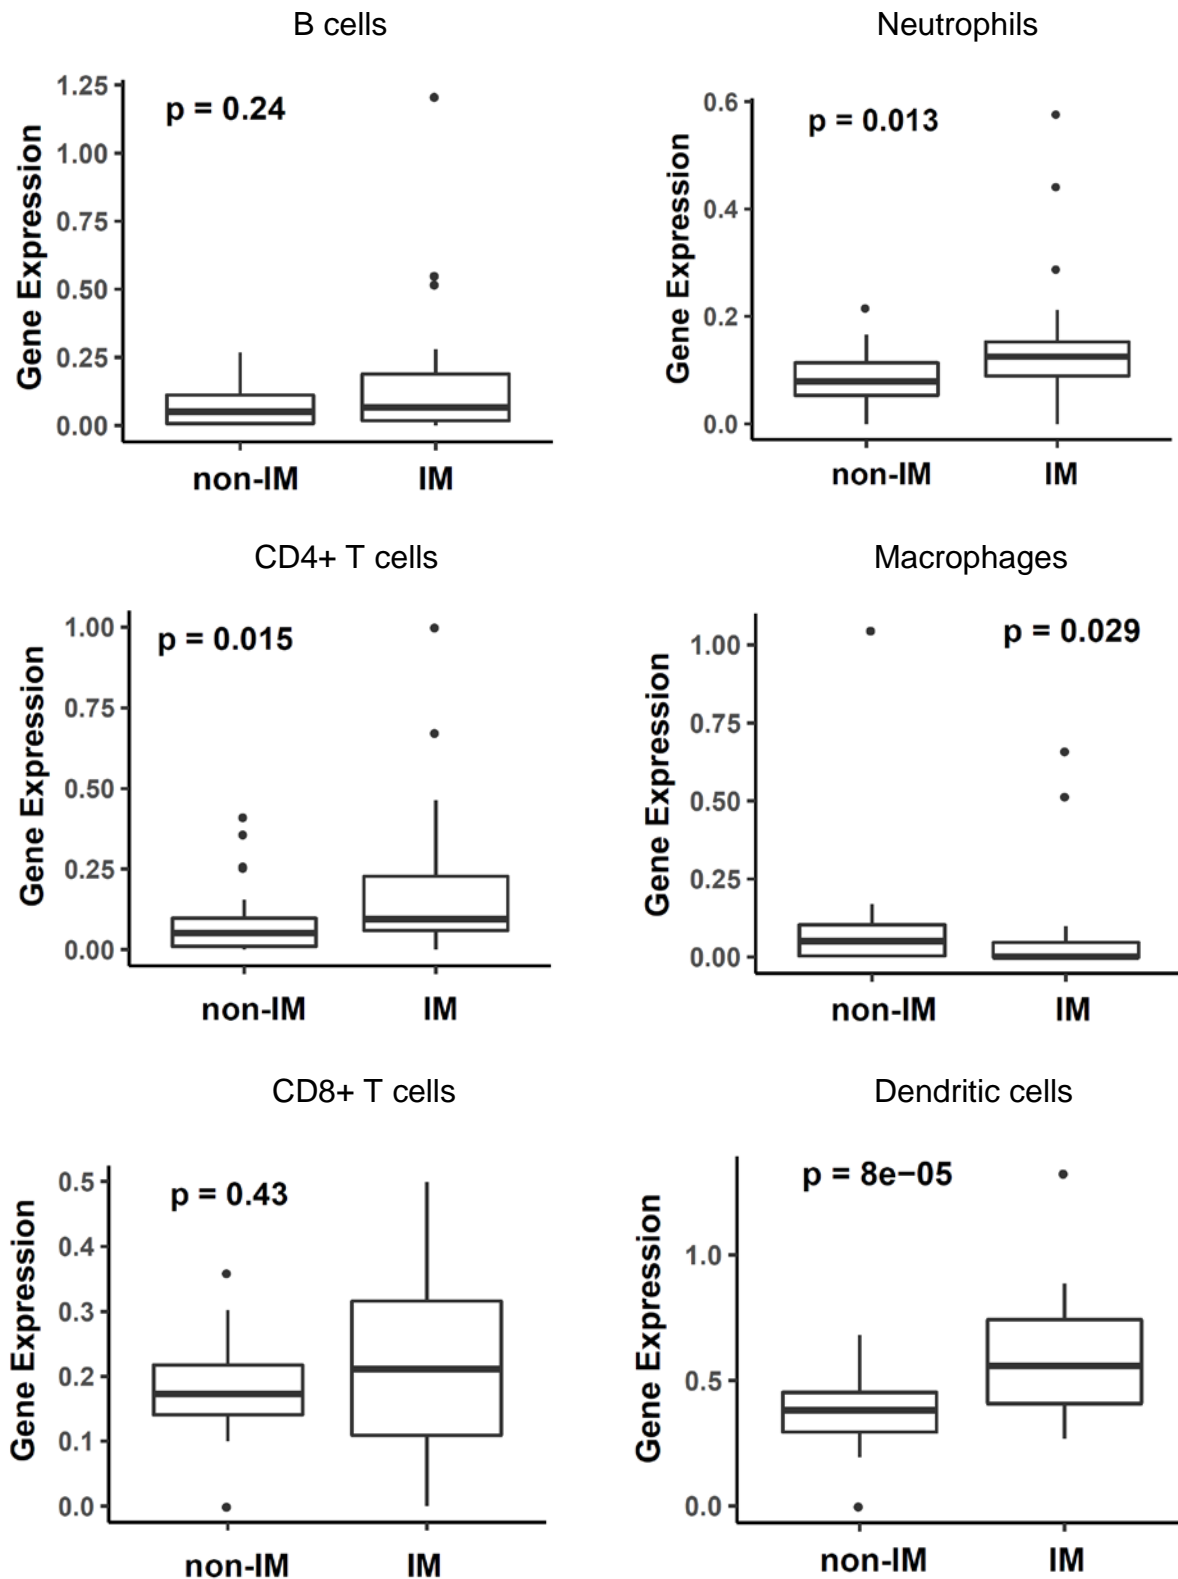

**Figure S1.** Gene expression of immune cell populations in the tumor microenvironment in patients with primary triple-negative breast cancer positive (immunomodulatory; IM) and negative (non-IM) for the 27-gene IO signature by TIMER algorithm. Boxes indicate 25th percentile, median, and 75th percentile. Each dot corresponds to one patient.

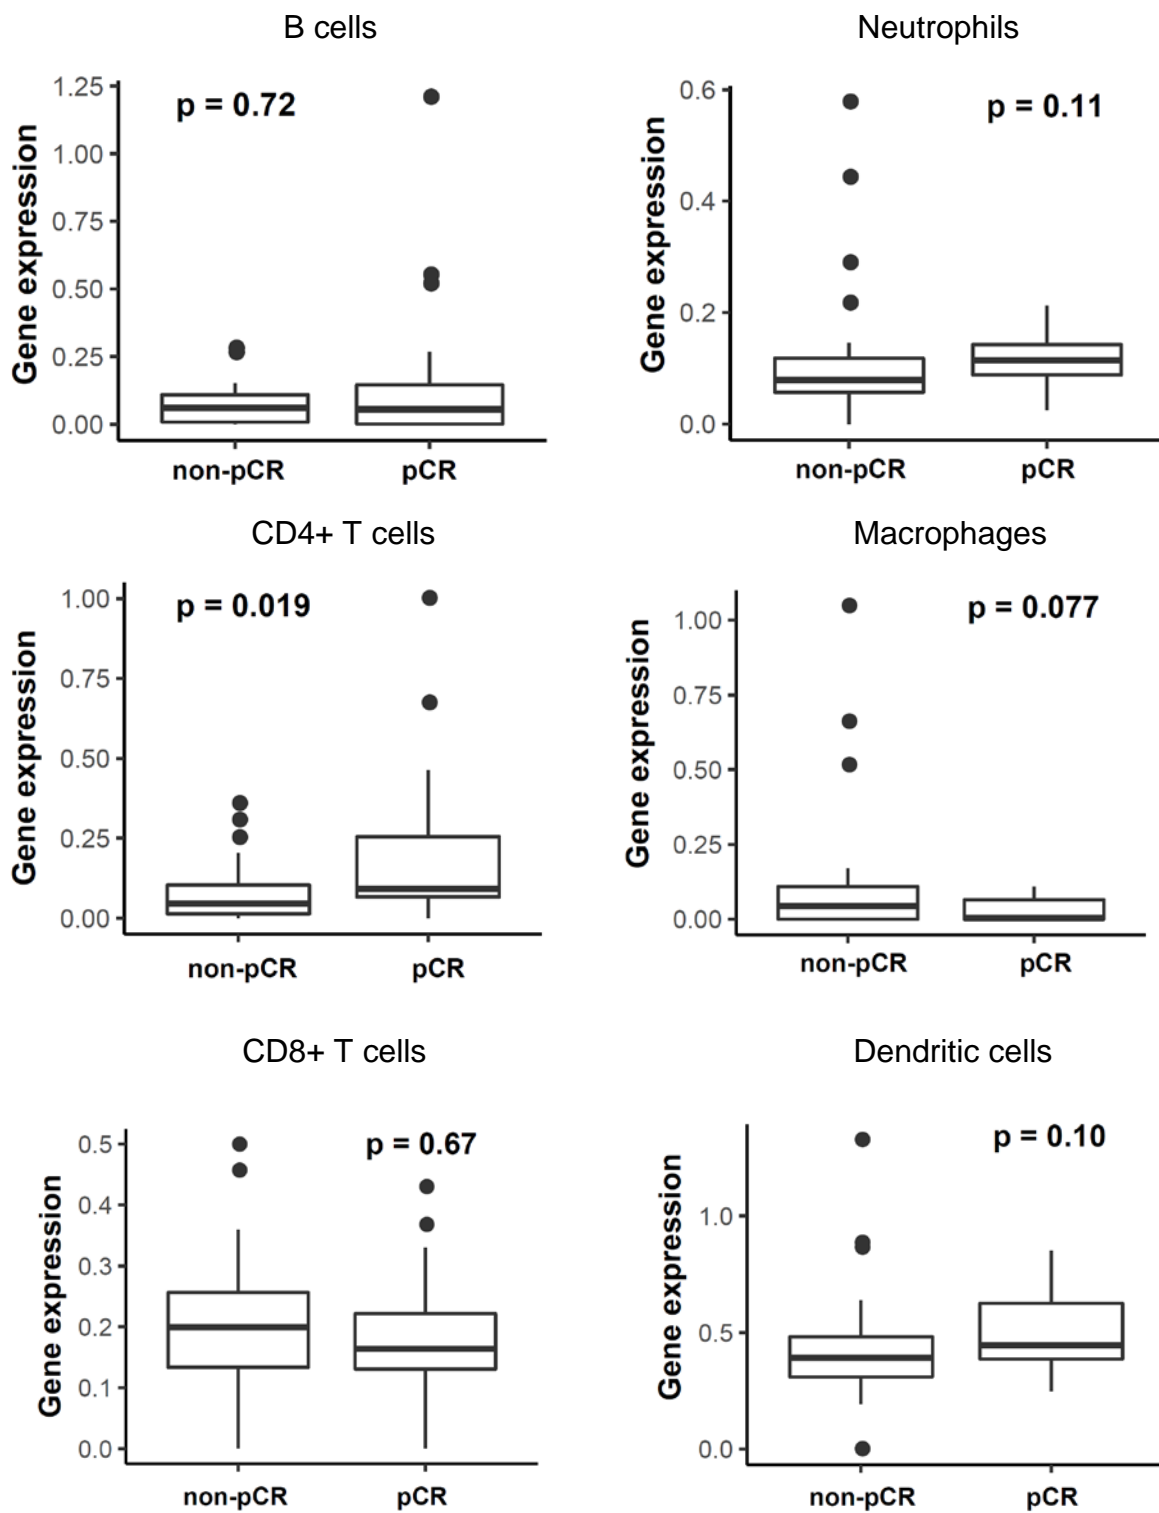

**Figure S2..** Gene expression of immune cell populations in the tumor microenvironment in patients with a pathological complete response (pCR) or without a pCR (non-pCR) by TIMER algorithm.

Naïve B cells

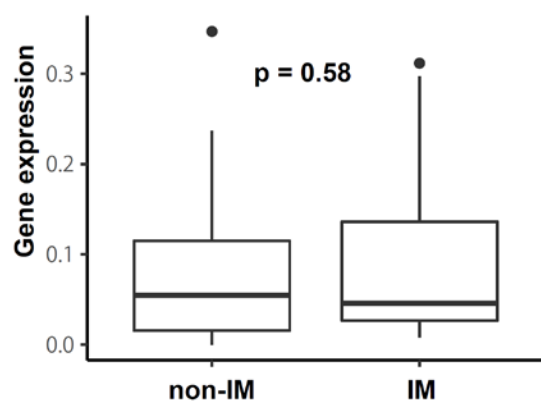

Memory B cells

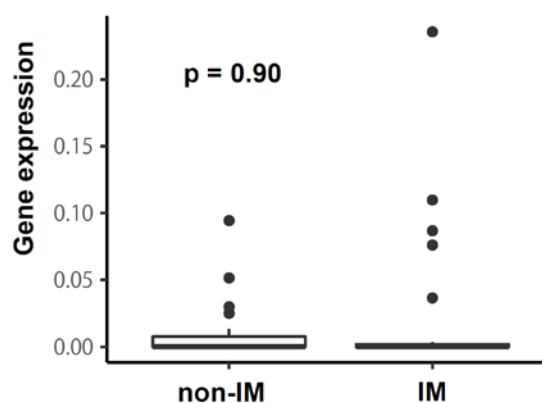

Plasma B cells

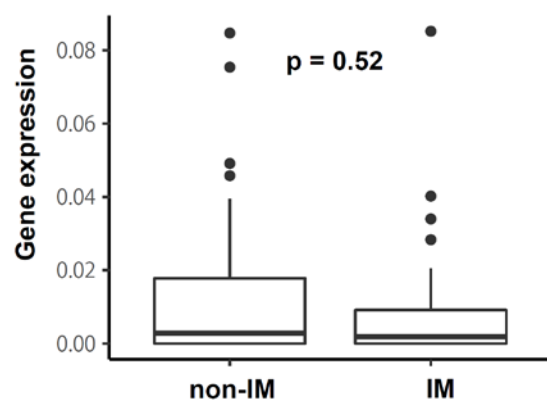

CD8+ T cells

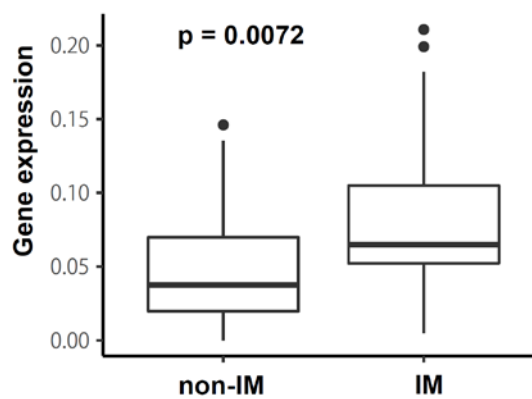

Naïve CD4+ T cells

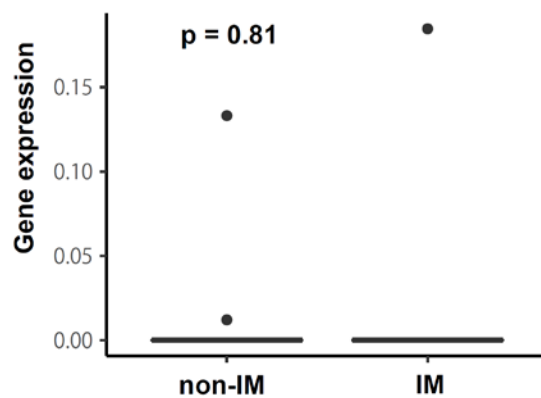

Resting memory CD4+ T cells

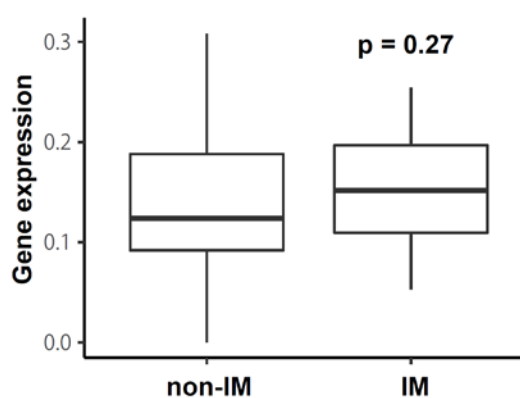

Activated memory CD4+ T cells

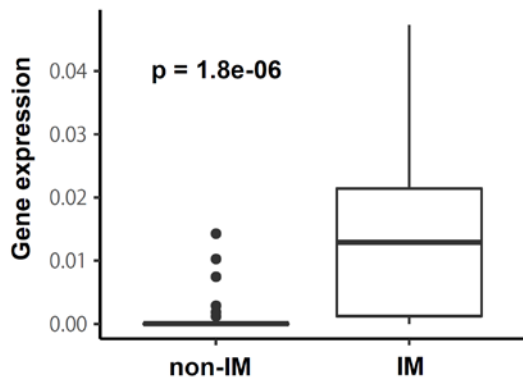

Follicular T helper cells

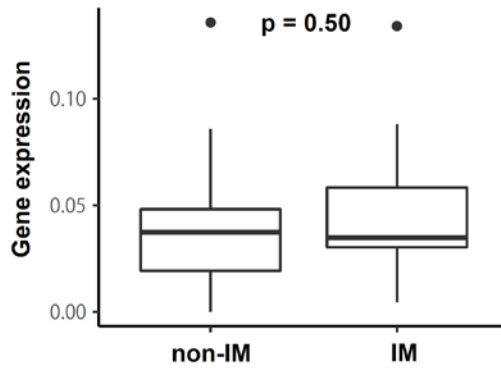

Regulatory T cells

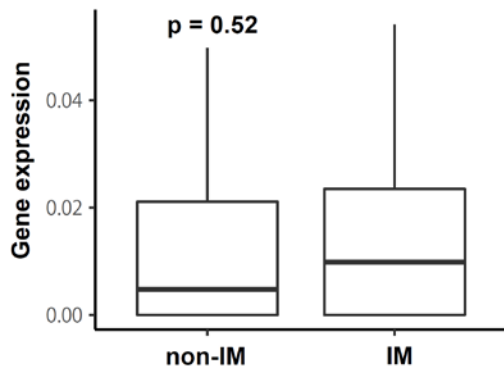

Resting NK cells

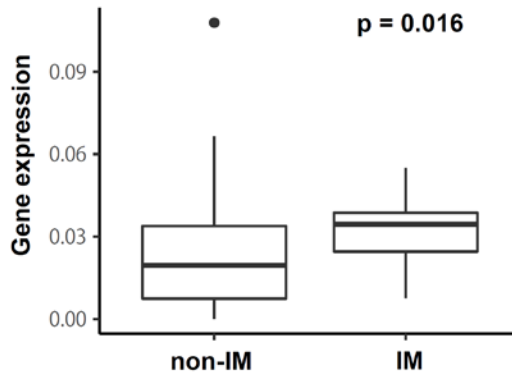

Activated NK cells

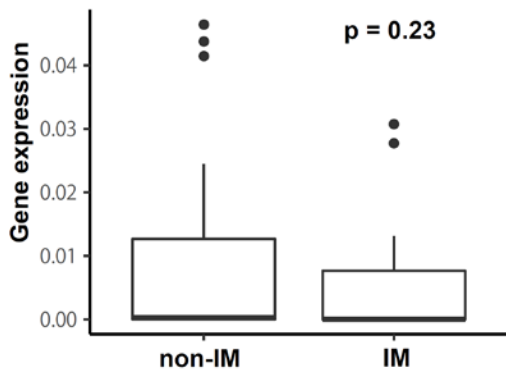

Monocytes

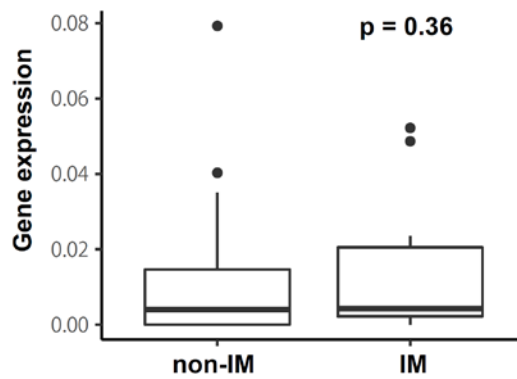

M0 macrophages

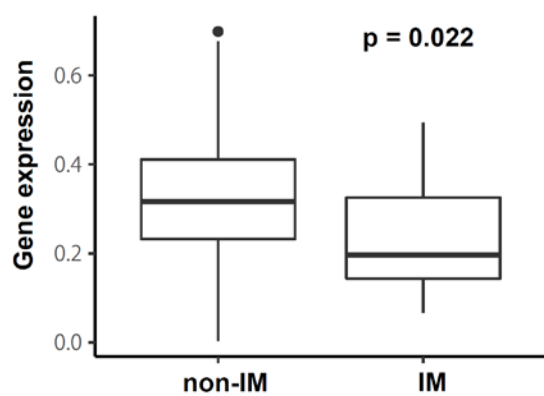

M1 macrophages

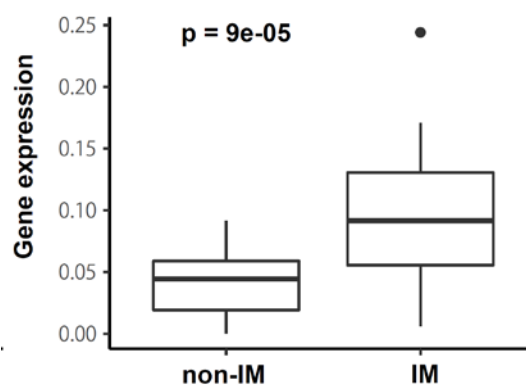

M2 macrophages

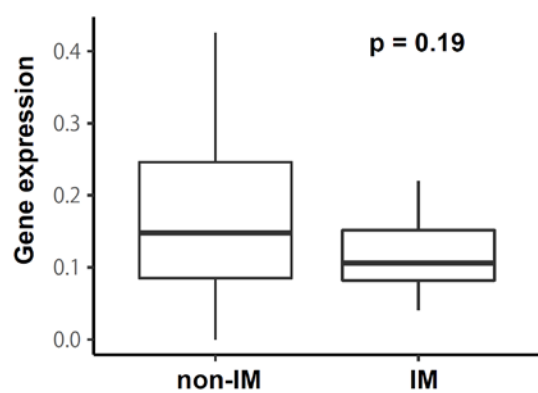

Resting dendritic cells

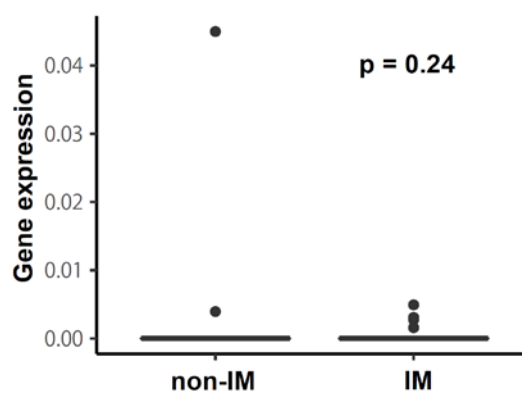

Activated dendritic cells

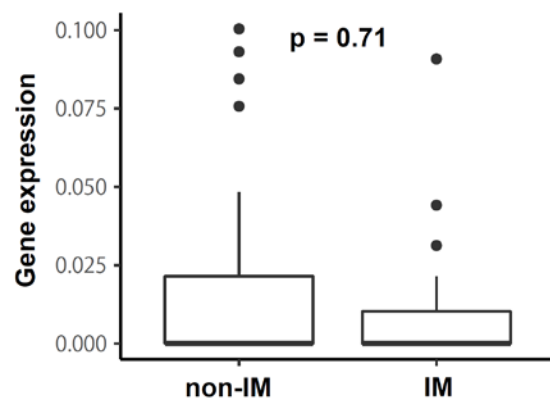

Resting mast cells

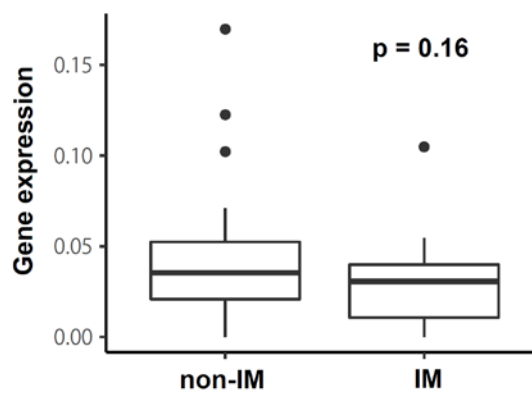

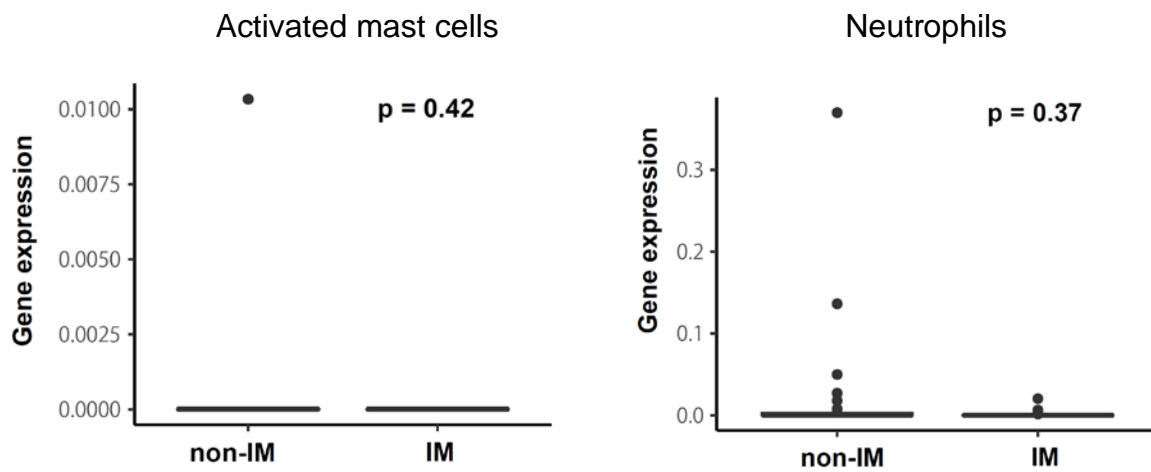

**Figure S3.** Gene expression of immune cell populations in the tumor microenvironment in patients with primary triple-negative breast cancer positive (immunomodulatory; IM) and negative (non-IM) for the 27-gene IO signature by CIBERSORT algorithm.

Naïve B cells

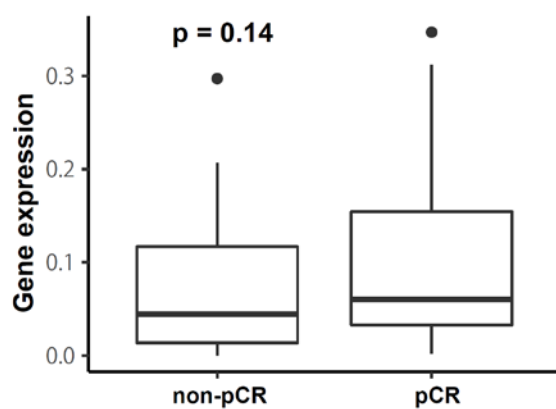

Memory B cells

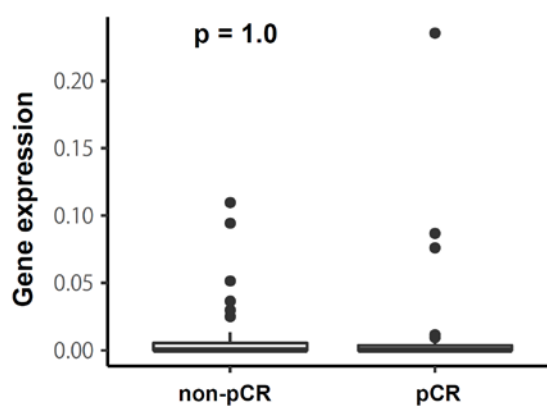

Plasma cells

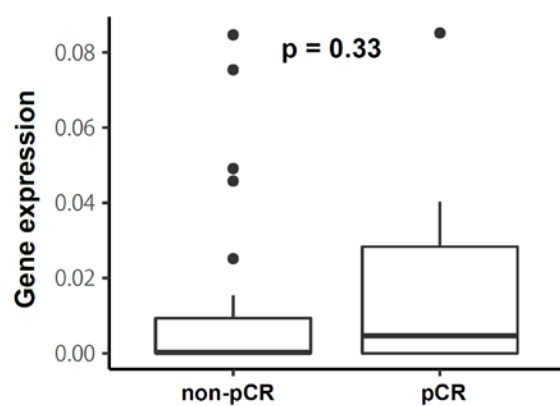

CD8+ T cells

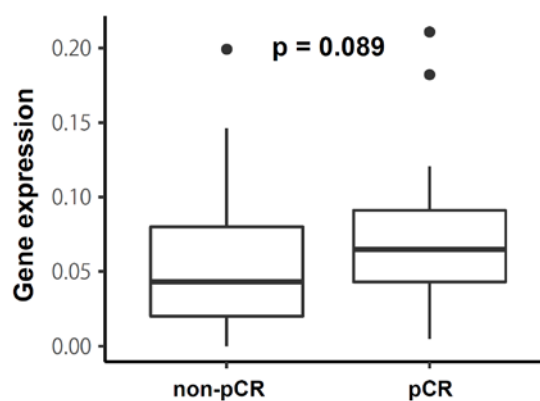

Naïve CD4+ T cells

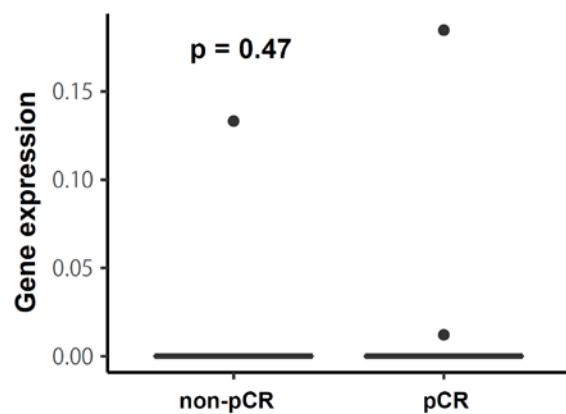

Resting memory CD4+ T cells

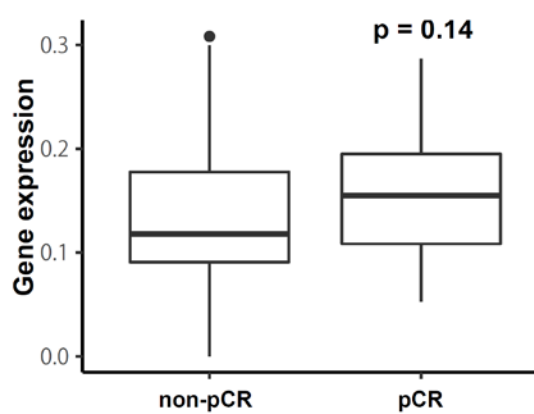

Activated memory CD4+ T cells

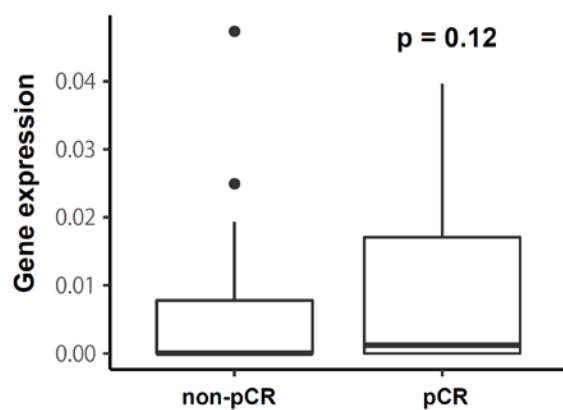

Follicular T helper cells

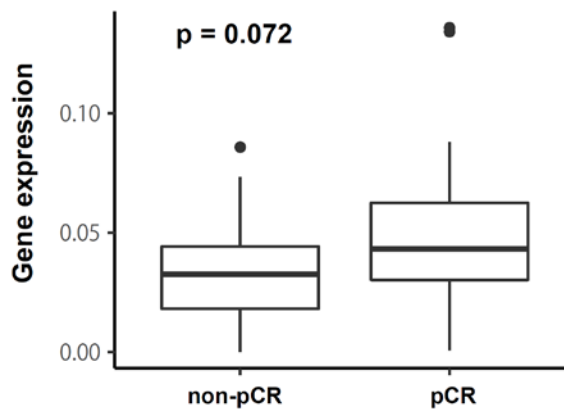

Regulatory T cells

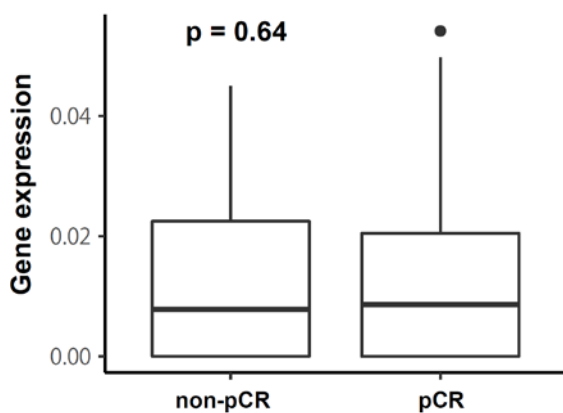

Resting NK cells

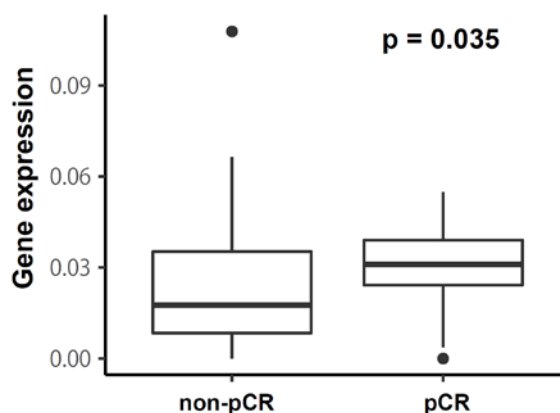

Activated NK cells

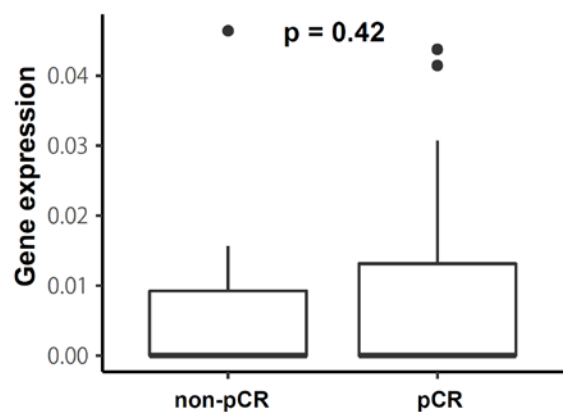

Monocytes

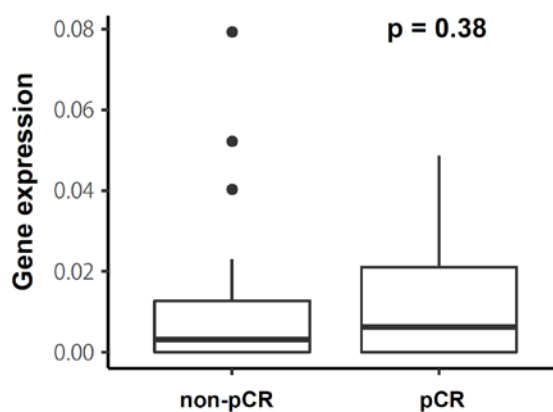



M0 macrophages

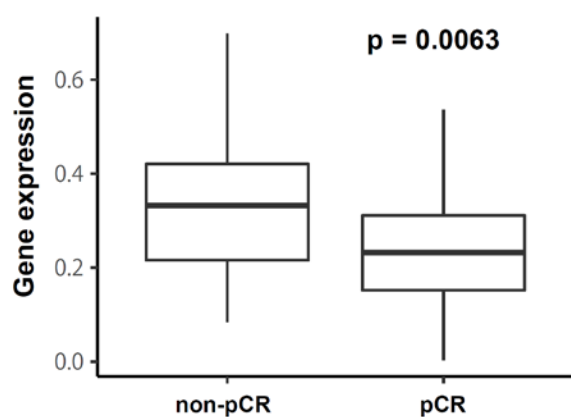

M1 macrophages

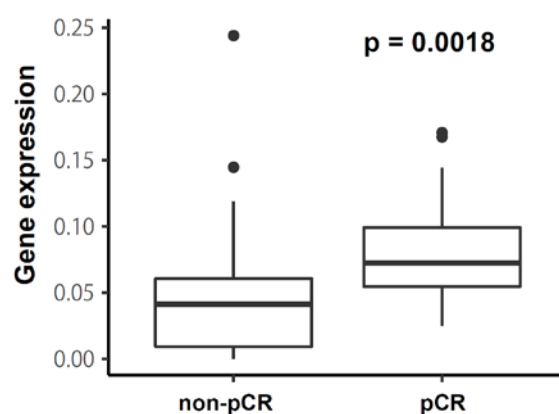

M2 macrophages

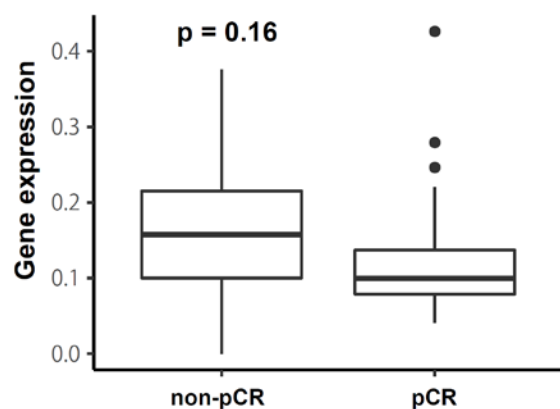

Resting dendritic cells

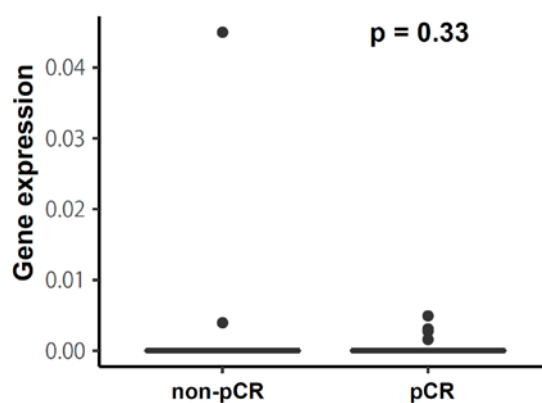

Activated dendritic cells

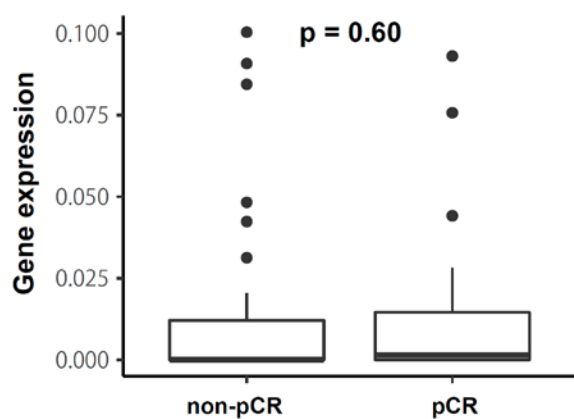

Resting mast cells

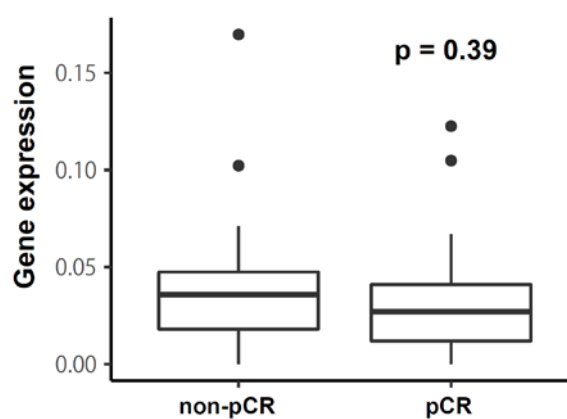

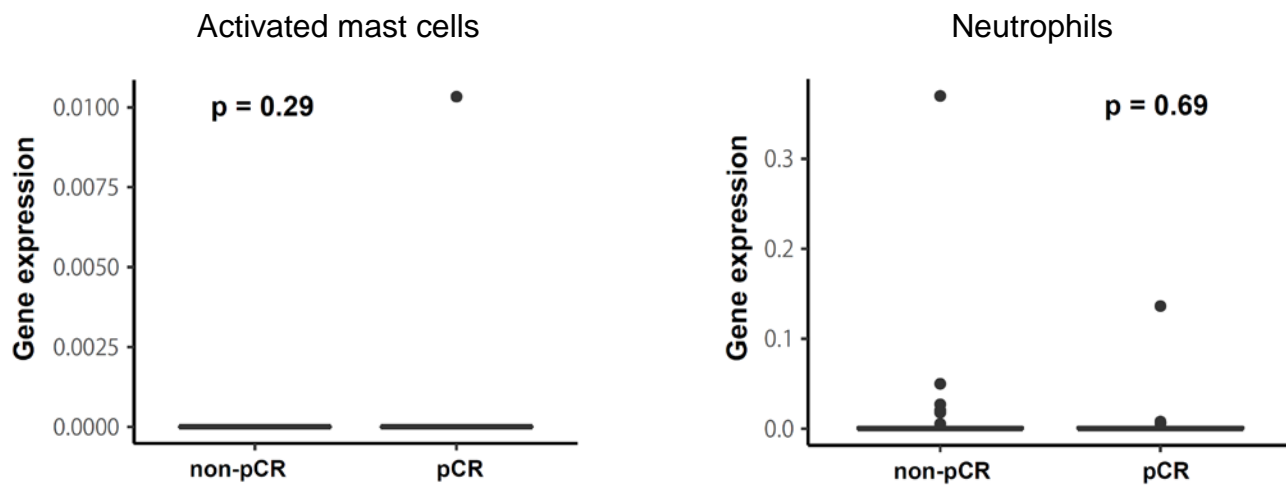

**Figure S4.** Gene expression of immune cell populations in the tumor microenvironment in patients with a pathological complete response (pCR) or without a pCR (non-pCR) by CIBERSORT algorithm.

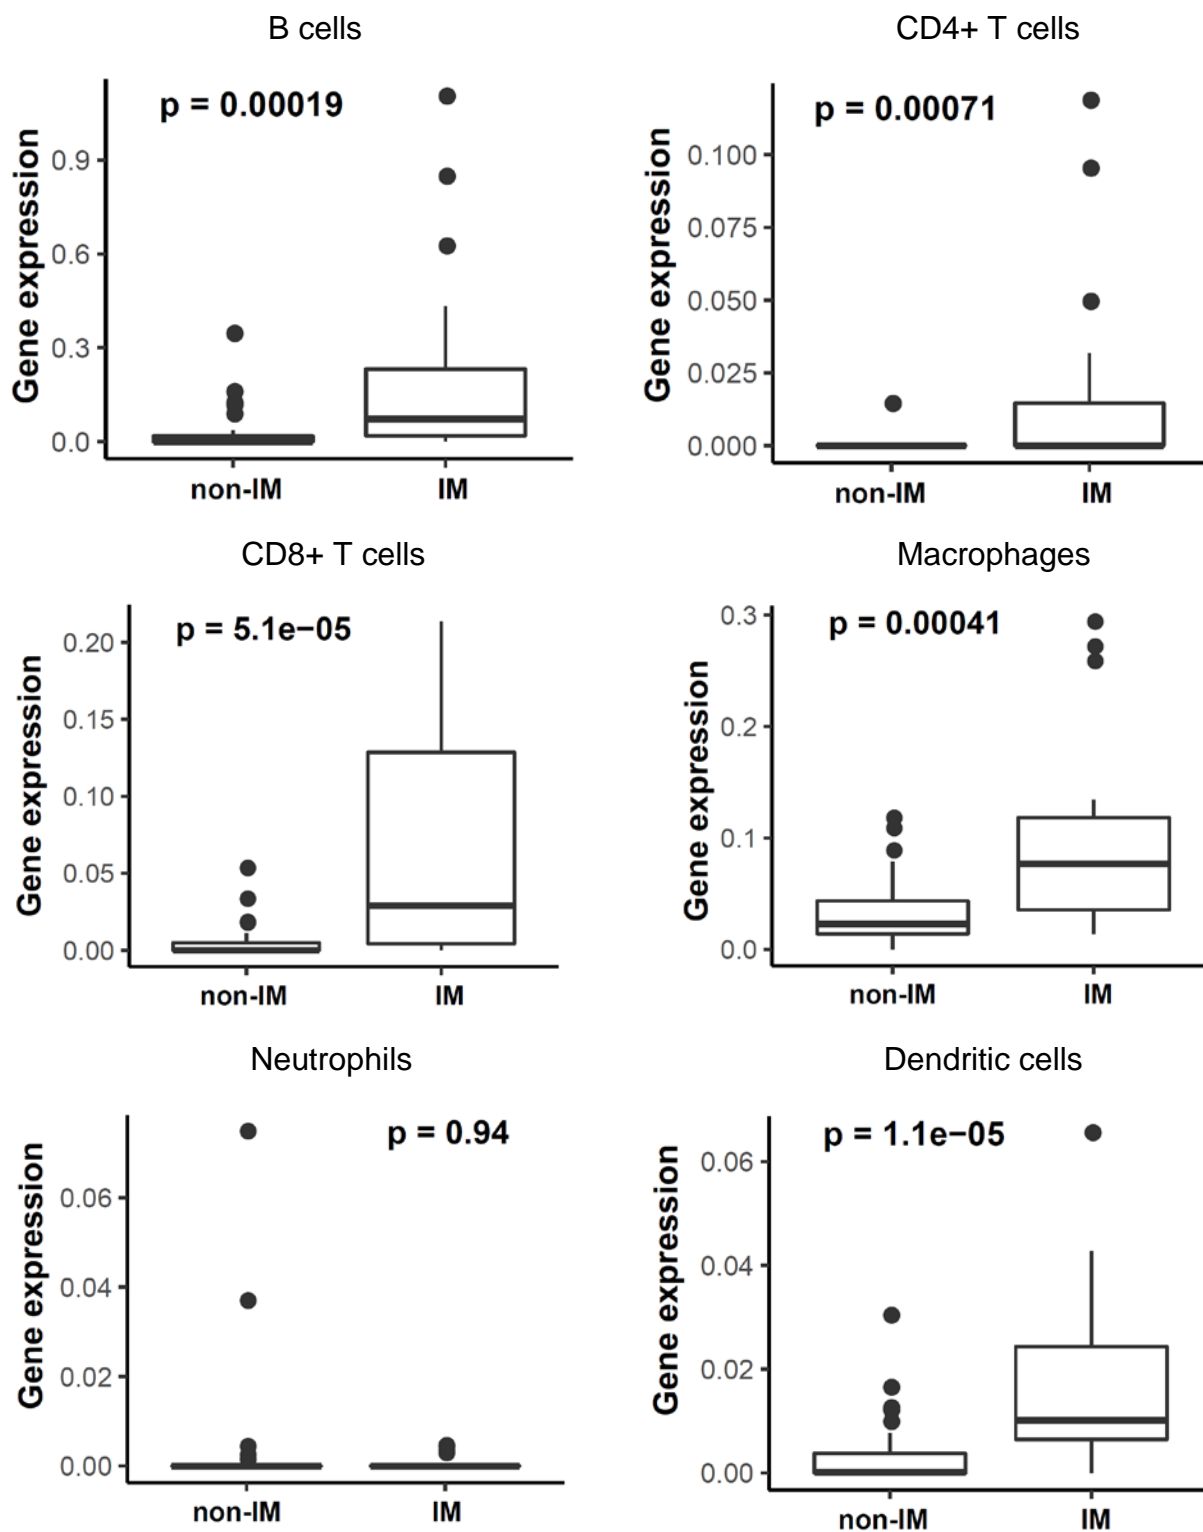

**Figure S5.** Gene expression of immune cell populations in the tumor microenvironment in patients with primary triple-negative breast cancer positive (immunomodulatory; IM) and negative (non-IM) for the 27-gene IO signature by xCell algorithm.

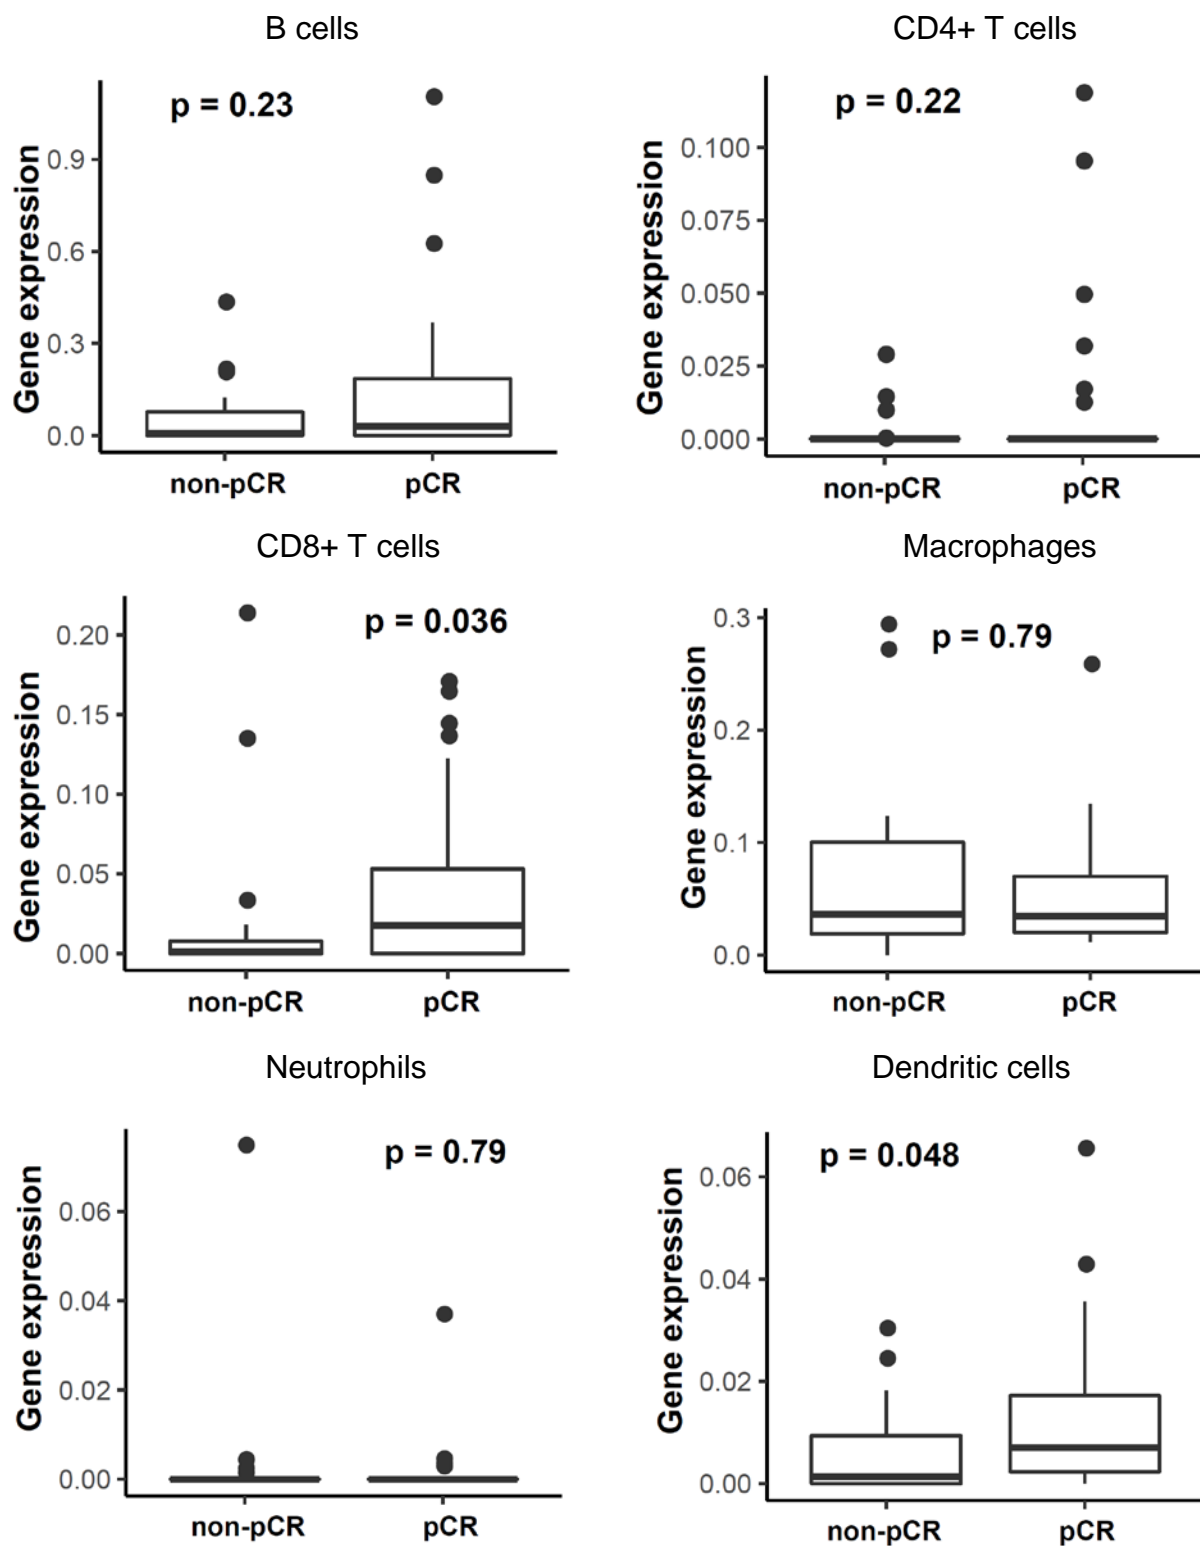

**Figure S6.** Gene expression of immune cell populations in the tumor microenvironment in patients with a pathological complete response (pCR) or without a pCR (non-pCR) by xCell algorithm.
